# Supplementary material for: Mosquito midgut stem cell cellular defense response limits Plasmodium parasite infection
Source: PubMed Central journal article supplement (PMC10873411; doi:10.1038/s41467-024-45550-2), 2024-02-16
Supplement: 41467_2024_45550_MOESM3_ESM.pdf [file 41467_2024_45550_MOESM3_ESM.pdf]

## Description of Additional Supplementary Files

File Name: Supplementary Movie 1

Description: Midgut progenitors in direct contact eliminate *P.berghei* oocysts from the midgut epithelia 10 days after infection (Top view).

File Name: Supplementary Movie 2

Description: Midgut progenitors in direct contact eliminate *P.berghei* oocysts from the midgut epithelia 10 days after infection (Side view).

File Name: Supplementary Movie 3

Description: Midgut progenitors in direct contact eliminate *P.berghei* oocysts from the midgut epithelia 14 days after infection (Top view).

File Name: Supplementary Movie 4

Description: Midgut progenitors in direct contact eliminate *P.berghei* oocysts from the midgut epithelia 14 days after infection (Side view).
